# Supplementary material
Source: HighWire-hosted journal article supplement (https://bmjopen.bmj.com/content/9/9/e031839)
Supplement: inline-supplementary-material-1 [file inline-supplementary-material-1.pdf]

## Supplement figure 1

# あなたの笑顔に 会いたくて



正しいシートベルト着用法が  
お母さんと赤ちゃんの命を守ります。

**ポイント 1**  
腰ベルト・肩ベルト  
共に着用する!

**ポイント 2**  
肩ベルトは  
胸の間を通し、  
おなかの側面に通す!

**ポイント 3**  
肩ベルトは  
首にかからないように!

**ポイント 4**  
腰ベルトは  
おなかの膨らみを避け、  
腰骨のできるだけ  
低い位置を通す!

※シートベルトを着用することが健康保持上適当でない場合は着用しなくてもよいこととされていますので、医師に確認するようにしましょう。

(財)全日本交通安全協会 / 警察庁 / (社)日本産科婦人科学会 / (社)日本産婦人科医会
